# Supplementary material for: Attitudes About Required Coverage of Mental Health Care in a U.S. National Sample
Source: Atypon-hosted journal article supplement (doi:10.1176/appi.ps.201400387), 2015-07-01
Supplement: appi.ps.201400387.ds001.pdf [file appi.ps.201400387.ds001.pdf]

**eAppendix 1: Demographic characteristics of survey respondents (weighted) compared to 2013 US population characteristics**

| Demographic Factor |          | Survey Respondents | US Census <sup>a,b</sup> |
|--------------------|----------|--------------------|--------------------------|
| Gender             |          |                    |                          |
|                    | Male, %  | 48.3               | 49.2                     |
|                    | Female   | 51.2               | 50.8                     |
| Age                |          |                    |                          |
|                    | 18-29    | 21.1               | 21.9                     |
|                    | 30-44    | 25.6               | 25.5                     |
|                    | 45-59    | 27.4               | 26.8                     |
|                    | 60+      | 25.9               | 25.9                     |
| Race/ethnicity     |          |                    |                          |
|                    | NH White | 66.5               | 62.6                     |
|                    | NH Black | 11.7               | 13.2                     |
|                    | NH Other | 7.6                | 6.7                      |
|                    | Hispanic | 14.1               | 17.1                     |

<sup>a</sup> gender and ethnicity proportions are for entire US population, not just those ≥18yo.

<sup>b</sup> Current Population Survey, United States Census Bureau, US Department of Commerce. Population estimates: population and housing unit estimates. <http://www.census.gov/popest/index.html>.
